# Supplementary material for: HS-SPME-GC-MS Analyses of Volatiles in Plant Populations—Quantitating Compound × Individual Matrix Effects
Source: MDPI journal article supplement (doi:10.3390/molecules23102436), 2018-09-23
Supplement: s1 [file s1]

# HS-SPME-GC-MS Analyses of Volatiles in Plant Populations – Quantitating Compound × Individual Matrix Effects

Elizabeth A. Burzynski-Chang,<sup>1</sup> Imelda Ryona,<sup>1</sup> Bruce I. Reisch,<sup>2</sup> Itay Gonda,<sup>3</sup> Majid R. Foolad,<sup>4</sup> James J. Giovannoni,<sup>3</sup> Gavin L. Sacks<sup>1\*</sup>

<sup>1</sup> Department of Food Science, Stocking Hall, Cornell University, Ithaca, New York 14853; [eab54@cornell.edu](mailto:eab54@cornell.edu), [ir45@cornell.edu](mailto:ir45@cornell.edu), [gls9@cornell.edu](mailto:gls9@cornell.edu)

<sup>2</sup> Horticulture Section, School of Integrative Plant Science, New York State Agricultural Experiment Station, Cornell University, Geneva, New York 14456; [bir1@cornell.edu](mailto:bir1@cornell.edu)

<sup>3</sup> Boyce Thompson Institute for Plant Science, Ithaca, New York 14850; [itaygonda@gmail.com](mailto:itaygonda@gmail.com), [james.giovannoni@ars.usda.gov](mailto:james.giovannoni@ars.usda.gov)

<sup>4</sup> Department of Plant Science, Pennsylvania State University, University Park, Pennsylvania 16802; [mrf5@psu.edu](mailto:mrf5@psu.edu)

\* Correspondence: [gls9@cornell.edu](mailto:gls9@cornell.edu); Tel.: 1-607-255-2335

## SUPPORTING INFORMATION

### MATERIALS & METHODS

**Chemical Reagents and Standards for [U<sup>13</sup>C]Hexanal and [U<sup>13</sup>C]Hexanol Synthesis.** The following chemicals were purchased from Sigma-Aldrich (St. Louis, MO): linoleic acid (95%), [U<sup>13</sup>C]  $\alpha$ -linoleic acid (>97%; >98% <sup>13</sup>C enrichment), Soybean lipoxygenase (LOX) (EC No. 1.13.11.12) type I-B (221700 units/mg), alcohol dehydrogenase (ADH) from *Saccharomyces cerevisiae* (15000 units/mg),  $\beta$ -Nicotinamide adenine dinucleotide (NADH), reduced disodium salt hydrate (>94%), hexanal ( $\geq$ 97%), and hexanol ( $\geq$ 98%). Chemicals for buffers (citric acid ( $\geq$ 99%), sodium phosphate mono- ( $\geq$ 99%), and di-basic ( $\geq$ 98%), sodium bicarbonate ( $\geq$ 99%), and sodium carbonate ( $\geq$ 99%)) and organic solvents – ethanol ( $\geq$ 98%; EtOH), methanol ( $\geq$ 99%; MeOH), dichloromethane ( $\geq$ 99%; DCM), and pentane ( $\geq$ 99%) – were also purchased from Sigma Aldrich.

### Preparation of Stock and Working Solutions for [U<sup>13</sup>C]Hexanal and [U<sup>13</sup>C]Hexanol

#### Synthesis

Enzyme solutions: Separate solutions of LOX (753780 units/mL) and ADH (39300 units/mL) stock solution were prepared by addition to 20 mL of Milli-Q water. Each stock was then stored in glass vials at -80 °C in 1.5 mL aliquots and thawed prior to use.

Chemical Standards: A solution of linoleic acid (5% w/w) was prepared by weighing 0.5 g of linoleic acid into 9.5 g of EtOH. [U<sup>13</sup>C]linoleic acid stock solution (0.1 g was diluted in EtOH solution yielding a 5.95% w/w stock solution. Unlabeled hexanal and hexanol were prepared in EtOH to yield 10 and 100  $\mu$ g/mL working solutions. NADH stock solution was prepared by adding 20 mL of Milli-Q water into 1 g of NADH yielding a stock concentration of 0.05 g/mL.

Buffer solutions: pH 4.5, pH 7.0, and pH 9.5 buffer solutions were prepared from 0.1 M citric acid/0.2 M sodium phosphate dibasic, 0.1 M sodium phosphate dibasic /0.1 M sodium phosphate monobasic, and 0.1 M sodium bicarbonate/0.1 M sodium carbonate respectively. The solutions were stored at 3 °C.

### Protocol for Enzymatic Synthesis of [U-<sup>13</sup>C]hexanal and [U-<sup>13</sup>C]hexanol from [U-<sup>13</sup>C]α-linoleic acid

The protocol for generating [U-<sup>13</sup>C]hexanal and [U-<sup>13</sup>C]hexanol is shown in Figure S.1. The yield of hexanal and hexanol was determined by calibration against unlabeled standards on GC-MS.

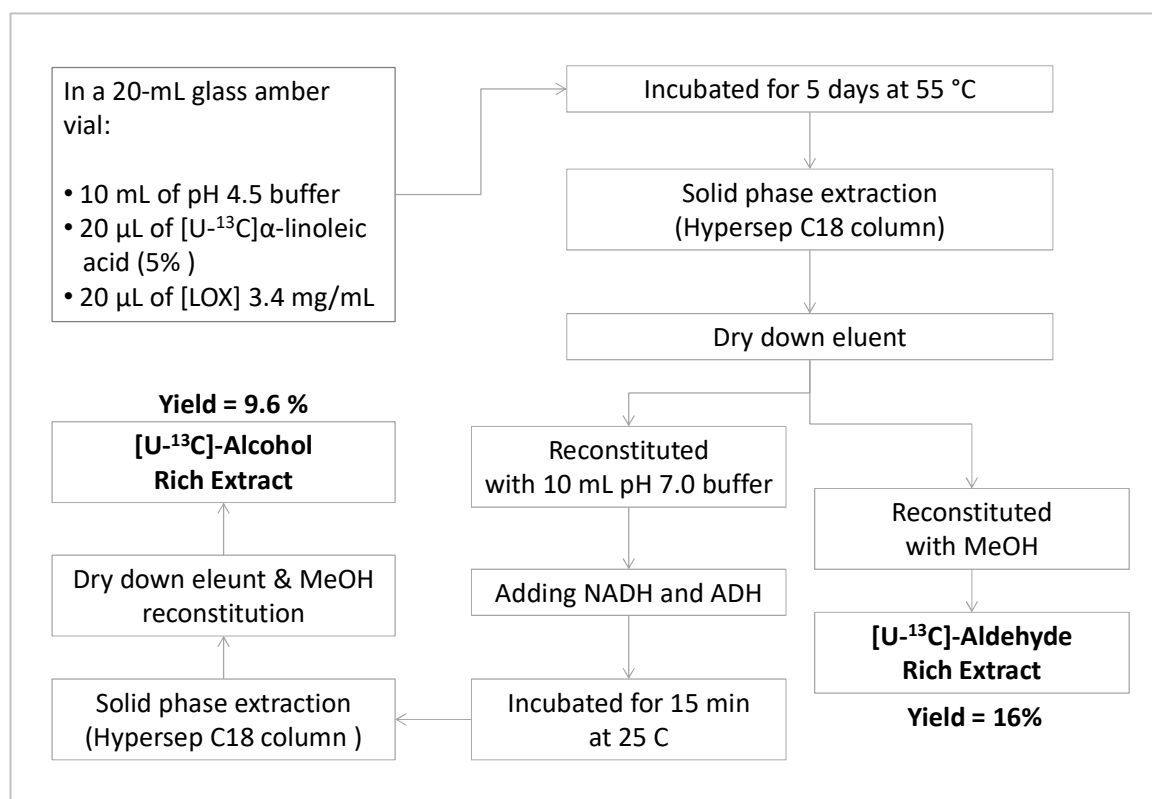

Figure S.1 – Protocol for generation of [U-<sup>13</sup>C]hexanal and [U-<sup>13</sup>C]hexanol from [U-<sup>13</sup>C]α-linoleic acid.

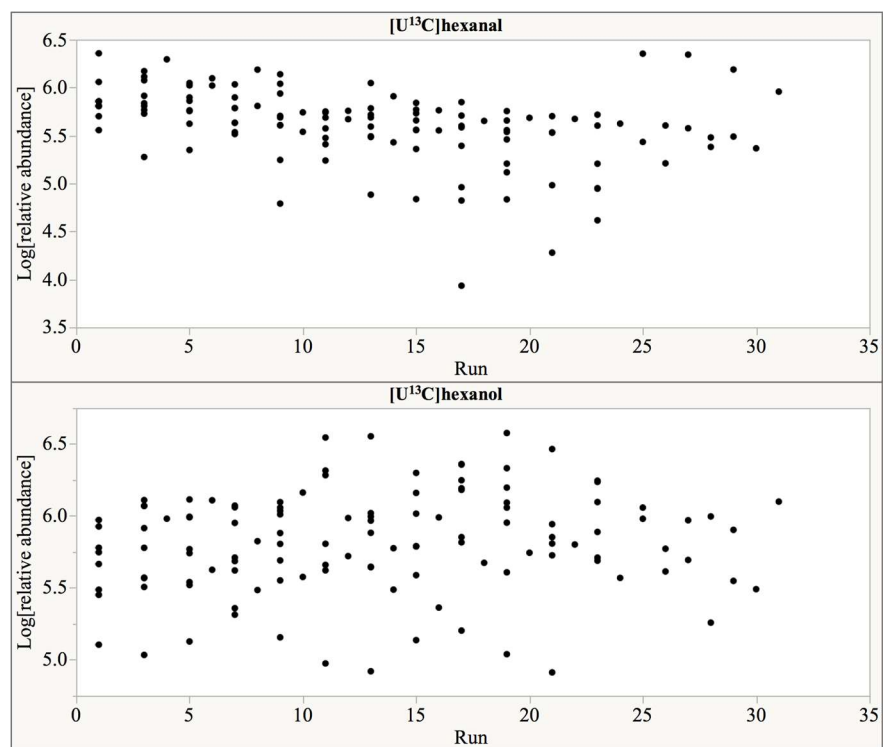

Figure S.2: Plot of ordinal run number (i.e. sample queue assignment) versus log-normalized peak areas for [U<sup>13</sup>C]hexanal (top) and [U<sup>13</sup>C]hexanol (bottom).
